# Supplementary material
Source: publisher figshare collection journal article supplement (https://acs.figshare.com/ndownloader/files/10996739)
Supplement: Supplementary file 1 [file 10996739]

# Supporting Information

---

## Enhancing the Oxygen Barrier Properties of Polylactide by Tailoring the Arrangement of Crystalline Lamellae

*Chunhai Li<sup>a</sup>, Ting Jiang<sup>b</sup>, Jianfeng Wang<sup>a</sup>, Shuangjuan Peng<sup>a</sup>, Hong Wu<sup>a\*</sup>, Jiabin Shen<sup>a\*</sup>, Shaoyun Guo<sup>a</sup>,  
Xi Zhang<sup>a</sup>, Eileen Harkin-Jones<sup>a</sup>*

<sup>a</sup>The State Key Laboratory of Polymer Materials Engineering, Polymer Research Institute of Sichuan University,  
Chengdu 610065, China

<sup>b</sup>School of Chemistry, State Key Laboratory of Biotherapy of Sichuan University, Chengdu 610065, China

This Supporting Information contains two figures in one pages.

Corresponding author. Tel: 028-85466077. E-mail: [wh@scu.edu.cn](mailto:wh@scu.edu.cn) (Hong Wu)

Corresponding author. Tel: 028-85466077. E-mail: [shenjb@scu.edu.cn](mailto:shenjb@scu.edu.cn) (Jiabin Shen)

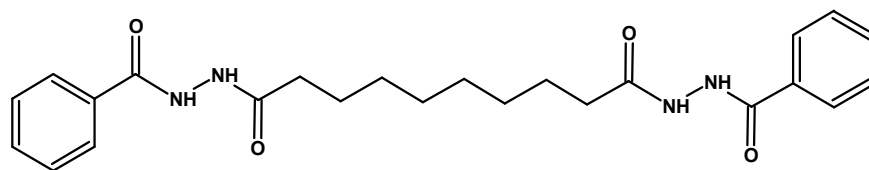

**Figure S1.** Chemical structure of the TMC-300

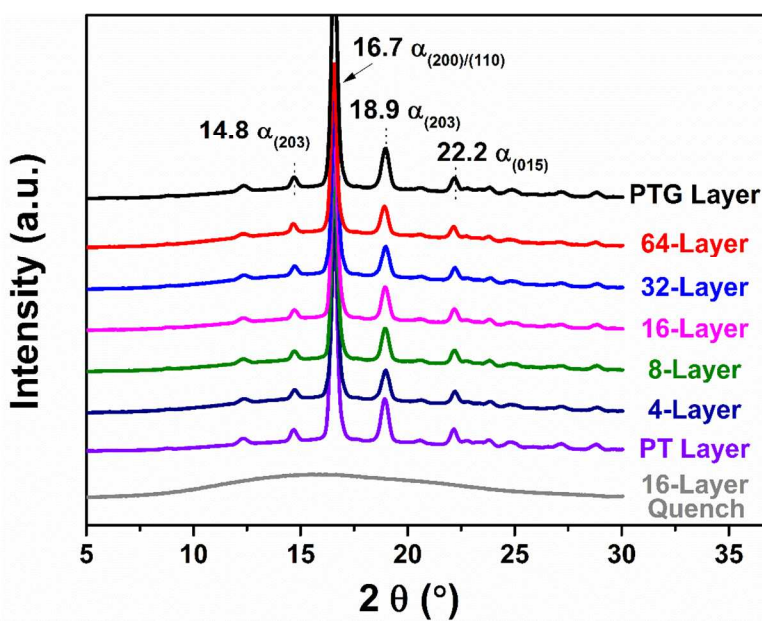

**Figure S2.** 1D-WAXD intensity profiles extracted from 2D-WAXD. The peak position and corresponding assignment to the specific lattice planes are marked on the diffraction peaks
